# Supplementary material for: Halocuprate(i) zigzag chain structures with N-methylated DABCO cations – bright metal-centered luminescence and thermally activated color shifts
Source: Royal Society of Chemistry journal article supplement (doi:10.1039/c5dt02709h), 2015-01-01
Supplement: c5dt02709h1.pdf [file c5dt02709h1.pdf]

# Halocuprate(I) Zigzag Chain Structures with *N*-Methylated DABCO Cations – Bright Metal-Centered Luminescence and Thermally Activated Color Shifts

Sebastian Maderlehner <sup>a‡</sup>, Markus J. Leitl <sup>b‡</sup>, Hartmut Yersin <sup>\*b</sup>, Arno Pfitzner <sup>\*a</sup>

<sup>a</sup> Institute for Inorganic Chemistry, University of Regensburg, Universitätsstraße 31, 93053 Regensburg, Germany. Fax: +49 941 943814551; Tel: +49 941 943 4551; E-mail: arno.pfitzner@chemie.uni-regensburg.de

<sup>b</sup> Institute for Physical Chemistry, University of Regensburg, Universitätsstraße 31, 93053 Regensburg, Germany. Fax: +49 941 9434488; Tel: +49 941 943 4464; E-mail: hartmut.yersin@chemie.uni-regensburg.de

<sup>‡</sup>These authors contributed equally to this work

## Electronic Supporting Information

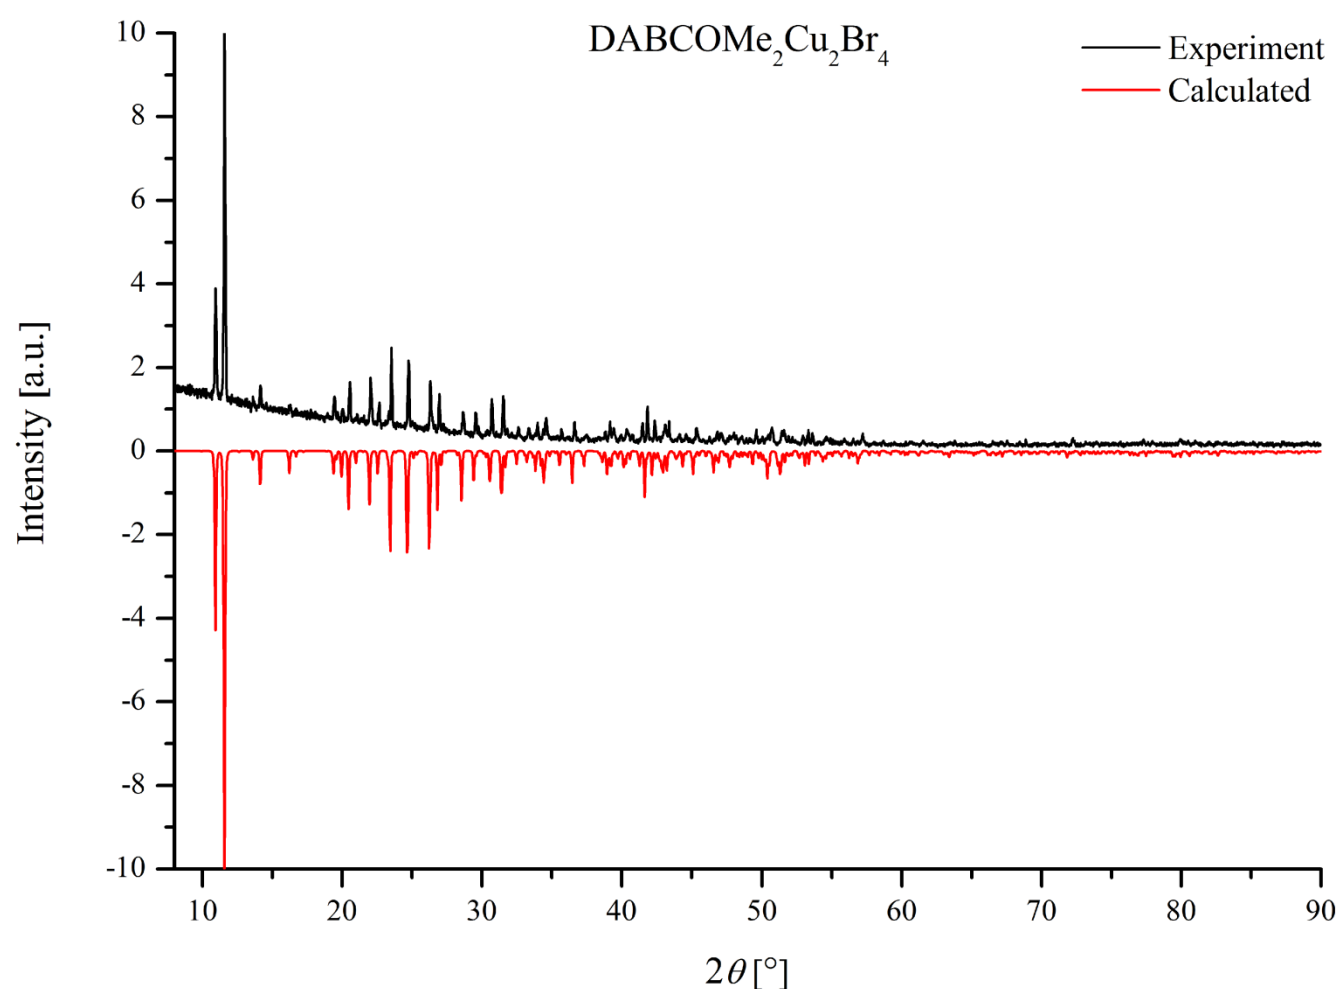

**Figure S1.** Experimental and calculated powder diffraction pattern of **1** showing the excellent match of experimental and simulated data.

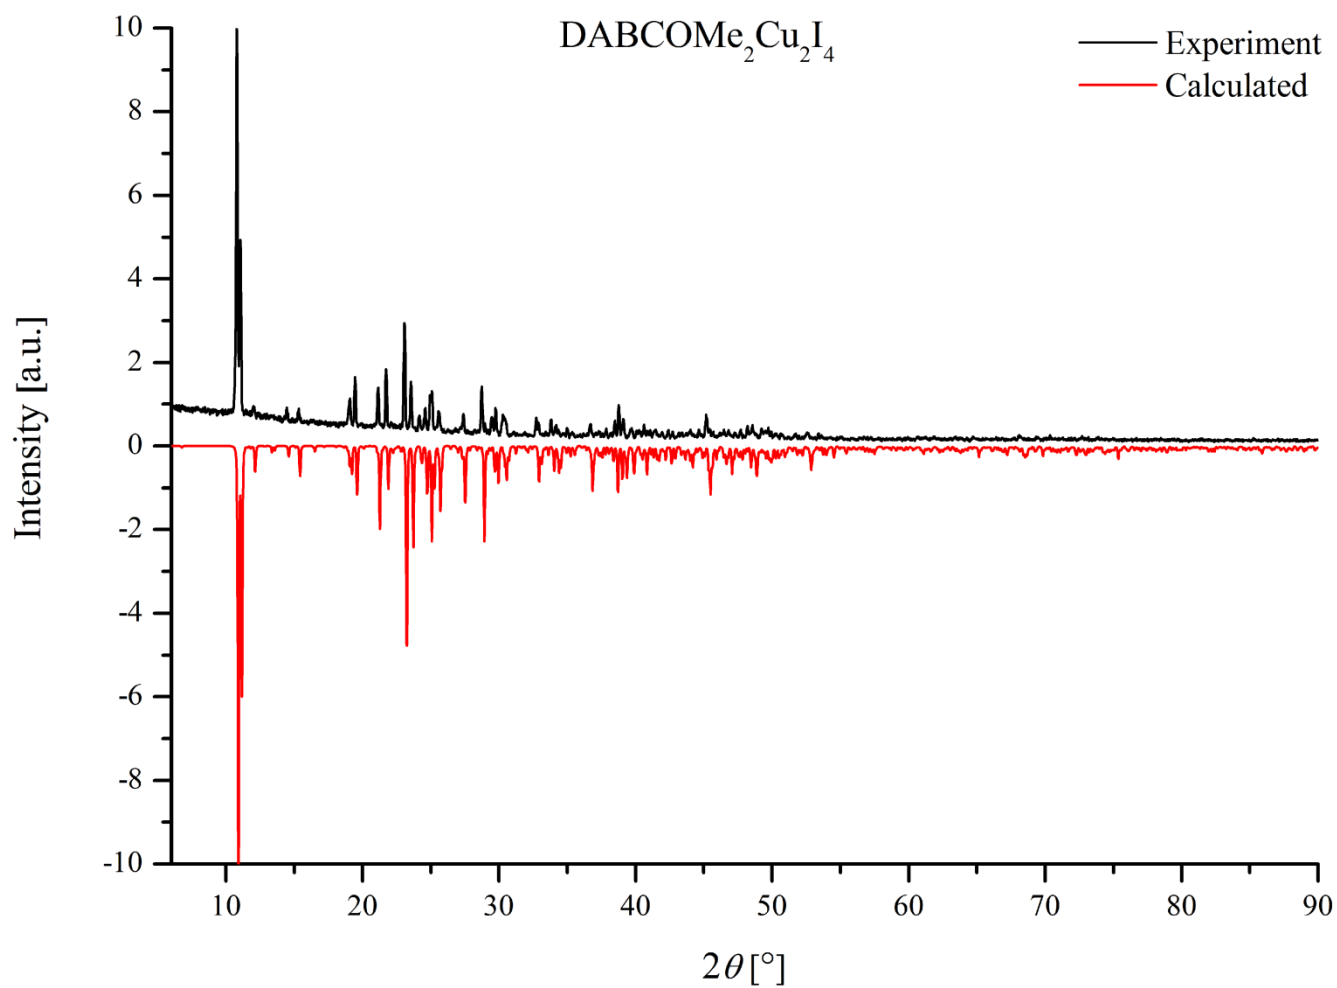

**Figure S2.** Experimental and calculated powder diffraction pattern of **2** showing a very good match of experimental and simulated data.

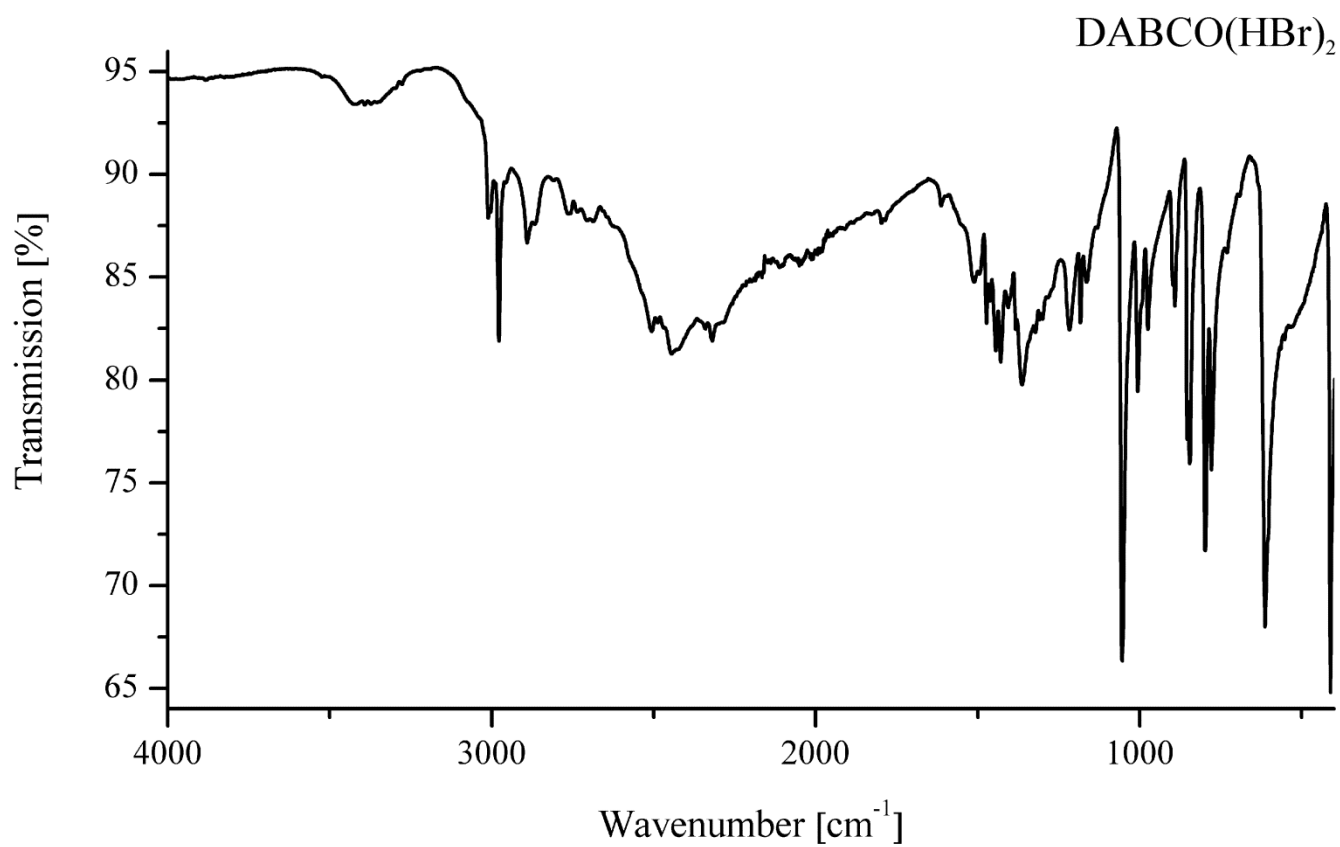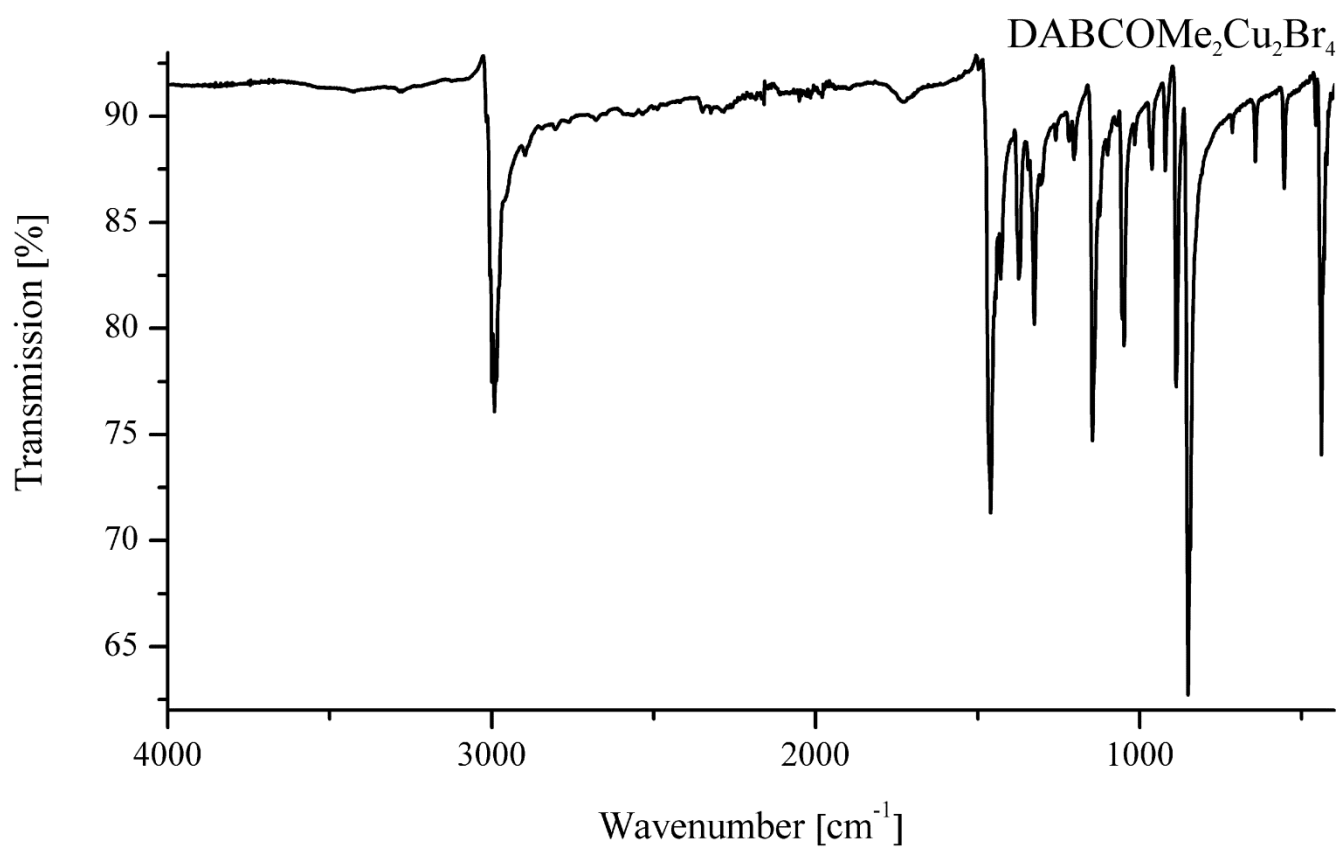

**Figure S3.** IR-spectra of DABCO(HBr)<sub>2</sub> and **1**.

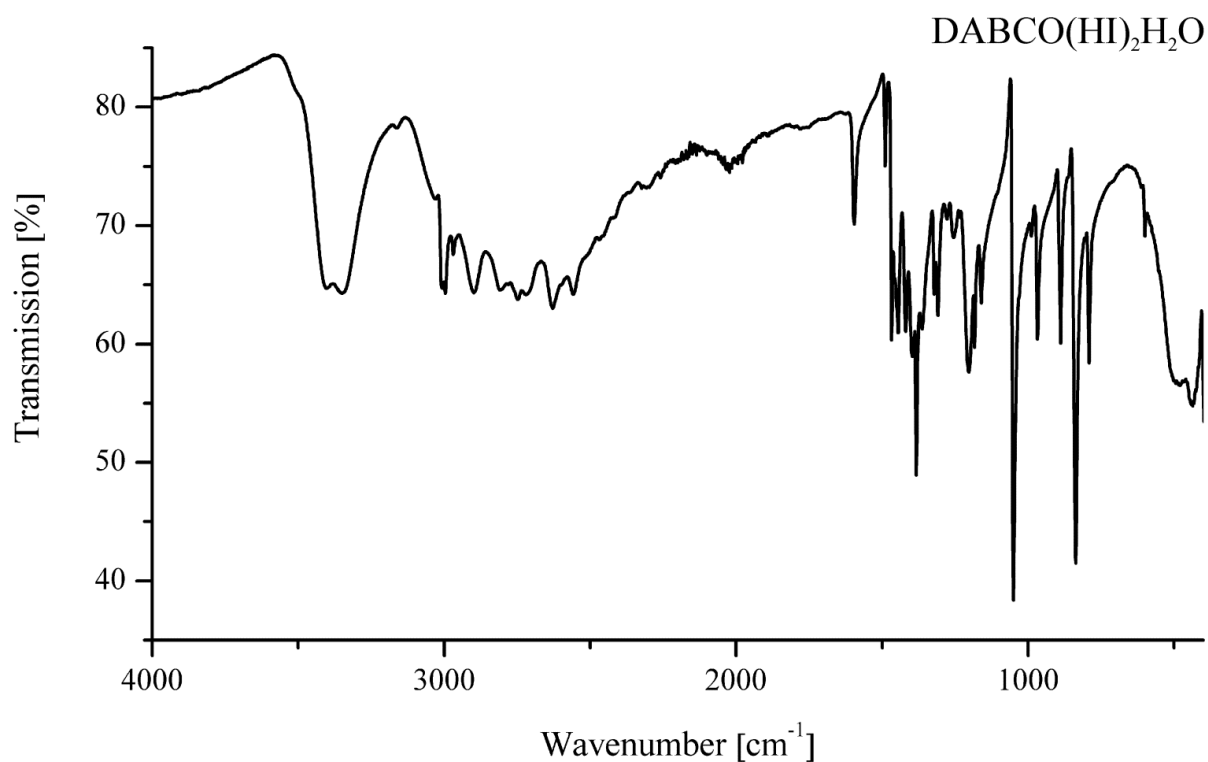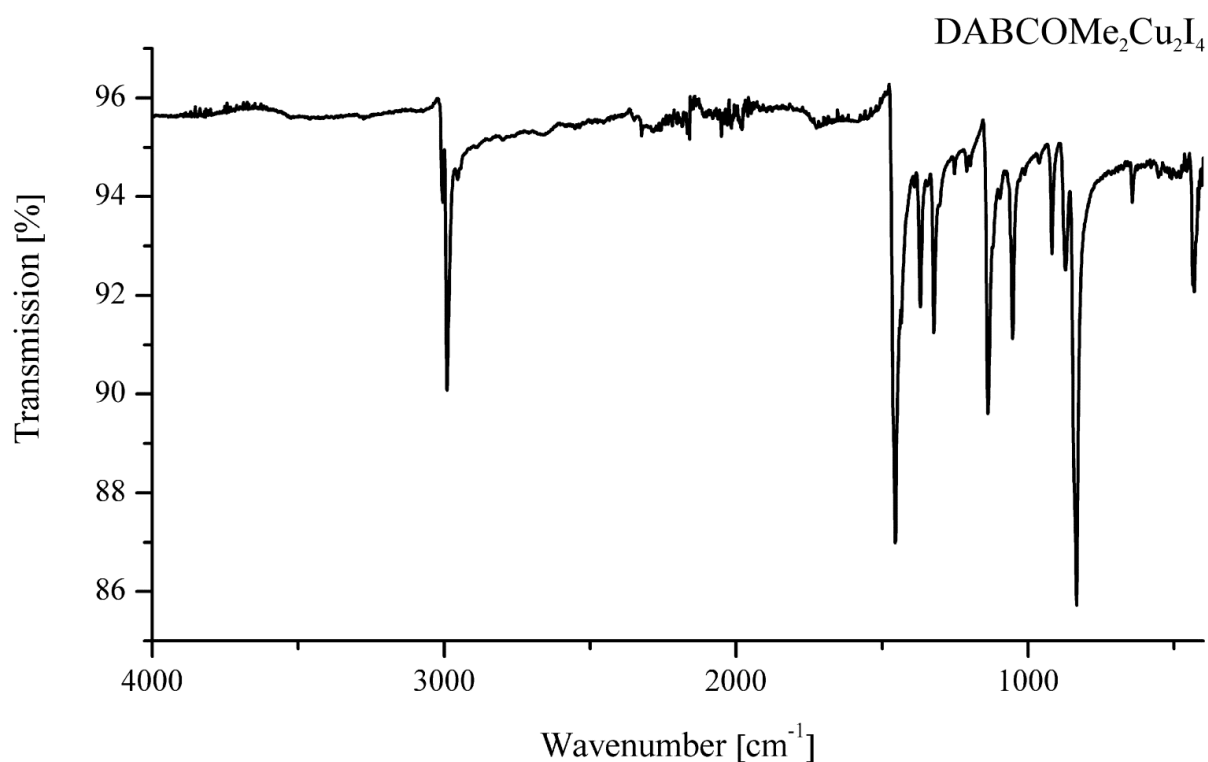

**Figure S4.** IR-spectra of DABCO(HI)<sub>2</sub>H<sub>2</sub>O and **2**.

The IR-spectra clearly show the quantitative twofold *N*-methylation of the DABCO molecules. The N-H-stretching modes present in the spectra of the starting materials in the range from 2000 to 2800 cm<sup>-1</sup> are absent in **1** and **2**. Only one large peak at approximately 3000 cm<sup>-1</sup> which is caused by the C-H-stretching modes of the methyl and methylene groups of the DABCOMe<sub>2</sub><sup>2+</sup> cations can be observed in **1** and **2**.
